1 **A blended learning approach for capacity strengthening to improve the quality of**  
2 **integrated HIV, TB, and Malaria services during antenatal and postnatal care in**  
3 **LMICs: A feasibility study**

4 Alice Norah Ladur<sup>1\*</sup>, Elizabeth Adjoa Kumah<sup>1</sup>, Uzochukwu Egere<sup>1</sup>, Florence Mgawadere<sup>1,11</sup>,  
5 Christopher Murray<sup>1</sup>, Marion Ravit<sup>1</sup>, Sarah Ann White<sup>1</sup>, Hauwa Mohammed<sup>2</sup>, Rael Mutai<sup>3</sup>,  
6 Lucy Nyaga<sup>3</sup>, Duncan Shikuku<sup>3</sup>, Issak Bashir<sup>4</sup>, Olubunmi Olufunmilola Ayinde<sup>5</sup>, Rukia  
7 Bakar<sup>6</sup>, Leonard Katalambula<sup>7</sup>, Carlo Federici<sup>8</sup>, Aleksandra Torbica<sup>8</sup>, Nicholas Furtado<sup>9</sup> &  
8 Charles, Ameh<sup>1, 10, 11</sup>

9 **\*Corresponding author**

10 Alice Ladur

11 [Alice.Ladur@lstm.ac.uk](mailto:Alice.Ladur@lstm.ac.uk)

12 **Affiliations**

13 <sup>1</sup>Department of International Public Health, Emergency Obstetric and Quality of Care Unit,  
14 Liverpool School of Tropical Medicine, Pembroke Place, L3, 5QA, United Kingdom

15 <sup>2</sup>Zankli Medical Centre, No 1 Ibrahim Tahir Street, Lane 900108, Abuja, Nigeria

16 <sup>3</sup>Liverpool School of Tropical Medicine, P.O. Box 24672 – 00100, Nairobi, Kenya

17 <sup>4</sup>Department of Family Health, P.O. Box 30016–00100, Ministry of Health, Nairobi, Kenya

18 <sup>5</sup>Department of Public Health, Ministry of Health, Oyo State Government Secretariat  
19 Parliament Rd, Mokola Hill 200285, Ibadan Nigeria

20 <sup>6</sup>School of Health and Medical Sciences, The State University of Zanzibar, P.O Box 146  
21 Zanzibar, Tanzania

22 <sup>7</sup>Department of Public Health, University of Dodoma, P.O. Box 353, Dodoma, Tanzania

23 <sup>8</sup>Centre for Research on Health and Social Care Management (CERGAS), SDA Bocconi  
24 school of management, Via Roberto Sarfatti, 10, 20136 Milano MI, Italy

**NOTE: This preprint reports new research that has not been certified by peer review and should not be used to guide clinical practice.**

25 <sup>9</sup>The Global Fund to Fight AIDS, Tuberculosis and Malaria, Global Health Campus, Chemin  
26 du Pommier 40, 1218 Grand-Saconnex, Geneva, 1218, Switzerland

27 <sup>10</sup>Department of Obstetrics and Gynaecology, University of Nairobi, P.O.Box 30197, GPO,  
28 Nairobi, Kenya

29 <sup>11</sup>University of Liverpool, School of Health Sciences, Brownlow Hill, Liverpool L69 3GB,  
30 United Kingdom

### 31 **Abstract**

32 The blended learning (BL) approach to training health care professionals is increasingly  
33 adopted in many countries because of high costs and disruption to service delivery in the  
34 light of severe human resource shortage in low resource settings. The Covid-19 pandemic  
35 increased the urgency to identify alternatives to traditional face-to-face (f2f) education  
36 approach. A four-day f2f antenatal care (ANC) and postnatal care (PNC) continuous  
37 professional development course (CPD) was repackaged into a 3-part BL course; 1) self-  
38 directed learning (16 hours) 2) facilitated virtual sessions (2.5 hours over 3 days) and 3)  
39 2-day f2f sessions. This study assessed the feasibility, change in healthcare providers'  
40 knowledge and costs of the BL package in Nigeria, Tanzania, and Kenya. A mixed methods  
41 design was used. A total of 89 healthcare professionals, were purposively selected.  
42 Quantitative data was collected through an online questionnaire and skills assessments,  
43 analyzed using STATA 12 software. Qualitative data was collected through key informant  
44 interviews and focus group discussions, analysed using thematic analysis.

45 Majority of participants (86%) accessed the online sessions using a mobile phone from  
46 home and health facilities. The median (IQR) time of completing the self-directed  
47 component was 16 hours, IQR (8, 30). A multi-disciplinary team comprising of 42% nurse-  
48 midwives, 28% doctors, 20% clinical officers and 10% other healthcare professionals  
49 completed the BL course. Participants liked the BL approach due to its flexibility in learning,  
50 highly educative/relevant content, mixing of health worker cadres and CPD points. Aspects  
51 that were noted as challenging were related to personal log-in details and network

52 connectivity issues during the self-directed learning and facilitated virtual sessions  
53 respectively. The blended learning approach to ANC-PNC in-service training was found to  
54 be feasible, cost saving compared to the face-to-face approach and acceptable to health  
55 care professionals in LMICs.

## 56 **Introduction**

57 Globally, maternal mortality ratio declined from 339 maternal deaths per 100,000 live  
58 births in 2000 to 223 in 2020, a 34.3% reduction over the 20-year period (1). However,  
59 this far exceeds the global Sustainable Development Goal target of less than 70 per  
60 100,000 (2). Although slight reduction in global MMR has been reported recently, sub-  
61 Saharan Africa still has the highest burden of the maternal mortality (545 maternal deaths  
62 per 100,000 live births) accounting for about 70% of maternal deaths in 2020 alone (1).  
63 Similarly, there has been an increase in births attended by skilled health personnel  
64 globally, but only 68% in low income and 78% in lower-middle-income countries are  
65 assisted by such skilled health personnel (3).

66 Most of the maternal deaths result from complications during and following pregnancy are  
67 preventable or treatable. Direct obstetric causes including haemorrhage before and after  
68 childbirth, hypertensive disorders, infections/sepsis after childbirth, complications from  
69 delivery and abortion account for about 75% of the maternal deaths globally (4). Global  
70 evidence shows that HIV, malaria, and TB-related complications are among the leading  
71 causes of indirect maternal mortalities and morbidities (4). In Kenya, the national  
72 confidential enquiry into maternal deaths in 2017 showed that HIV-related complications  
73 (22.9%) and malaria (10.4%) were among the leading indirect causes of maternal  
74 mortality (5). To reduce the maternal deaths, WHO through the Ending Preventable  
75 Maternal Mortality (EPMM) strategy recommends that countries should focus on addressing  
76 inequalities in access to and quality of reproductive, maternal, and newborn health care  
77 services; ensuring universal health coverage for comprehensive reproductive, maternal,  
78 and newborn health care; and addressing all causes of maternal mortality, reproductive  
79 and maternal morbidities, and related disabilities (6).

80 Building capacity of healthcare professionals through “in-house” trainings facilitates the  
81 acquisition of knowledge, skills, and competence to provide integrated antenatal (ANC)  
82 and postnatal care (PNC) services, contributing to quality of care in maternity services (7).  
83 Regular training is recommended to ensure continued accreditation of healthcare  
84 professionals (8).

85 A blended learning (BL) approach to training health care professionals is increasingly  
86 adopted in many countries to reduce prohibitive costs and disruption to service delivery in  
87 the light of severe human resource shortages in low resource settings (9). Blended  
88 learning presents a unique approach to offer “in-service or “on-the job training” for  
89 healthcare professionals involved in the provision of integrated antenatal and postnatal  
90 care services. Evidence suggests that a blended learning approach is as effective as  
91 conventional approaches in increasing providers’ knowledge while reducing costs (9, 10).  
92 Lessons learnt from the COVID-19 pandemic, highlighted the need to identify alternatives  
93 to traditional face-to-face training approaches in pre-service midwifery education in Kenya  
94 (11, 12). We developed and piloted a blended learning training package, in Kenya, Nigeria,  
95 and Tanzania, for healthcare providers in integrated TB, HIV and Malaria services in ANC  
96 and PNC as an alternative to our previously used face-to-face training package. This  
97 study's objectives were to determine the feasibility, acceptability, change in healthcare  
98 providers' knowledge and describe the cost of developing and implementing the blended  
99 learning package.

## 100 **Materials and Methods**

101 We conducted a feasibility and acceptability study of an ANC-PNC blended learning training  
102 course in Nigeria, Tanzania, and Kenya. The specific objectives of the study were to 1)  
103 explore the acceptability and feasibility of implementing our ANC and PNC blended learning  
104 course for healthcare providers in Nigeria, Tanzania, and Kenya, 2) assess the change in  
105 knowledge of healthcare providers after implementation of the ANC and PNC blended

106 learning course and 3) to describe the cost of developing the package, and compare the  
107 cost of its implementation in each of the study countries.

### 108 **Description of the ANC-PNC blended learning training course**

109 In collaboration with international stakeholders a multi-disciplinary team from Liverpool  
110 School of Tropical Medicine (LSTM) developed the ANC-PNC blended learning training  
111 course, using WHO recommendations and guidelines in the study countries (13). The  
112 course is designed to strengthen the capacity of healthcare professionals to provide quality  
113 integrated HIV, TB and Malaria Services in Antenatal care and Postnatal care in LMICs. It  
114 covers essential components of ANC and PNC, such as quality care, respectful maternity  
115 care, communication, mental health assessment and integration of HIV, TB, and malaria  
116 services. The target audience are nurses, midwives, clinical officers, medical assistants,  
117 doctors, and other cadres of health care providers involved in the provision of ANC-PNC in  
118 LMICs.

119 The blended learning training was completed in three parts: **1) self-directed learning.**  
120 Course instructions, pre-recorded lectures and reading materials were uploaded onto an  
121 online platform developed by the World Continuing Education Alliance (WCEA). Health  
122 professionals engaged with online course content at their own pace and timing over a  
123 period of two weeks (16 hours or 39% of the whole course) in August 2022. Upon  
124 completion of the self-directed learning, they are invited to complete part two: **2) virtual**  
125 **facilitated sessions.** In the second BL component, health professionals attended  
126 facilitated live sessions delivered via zoom over three days, lasting 2.5 hours per day (7.5  
127 hours in total, or 18% of the whole course) in August 2022. Upon completion of the two  
128 BL components, learners were invited to complete the last part of the blended learning  
129 course: **3) face-to-face sessions.** Learners and faculty attended this 2-day component  
130 in-person (18 hours or 43% of the whole course) in October 2022. During this component,  
131 health professionals engaged in activities designed to enable them to acquire hands-on  
132 skills and apply the theoretical concepts covered in the self-directed and virtual facilitated  
133 components. The component was delivered by experienced LSTM in-country

134 staff/implementation partners based in that country and Ministry of Health in the three  
135 countries.

### 136 **Study design**

137 Feasibility studies may be used to determine whether an intervention can be carried out  
138 and the appropriateness of the intervention from the recipient`s perspective (14). This  
139 study used a mixed-methods design with quantitative and qualitative data collected  
140 concurrently, analyses done independently and mixed/integrated during the overall  
141 discussion of findings (15).

142 The Kirkpatrick`s (1996) model was adopted to evaluate the feasibility and acceptability of  
143 the ANC-PNC blended learning training course. Kirkpatrick`s model consists of four levels  
144 of evaluation of a training programme: 1) reaction: this determines how learners engaged  
145 with the training and how actively they contributed to the training (including acceptability  
146 of the training programme); 2) learning: this assesses the learner`s learning outcomes  
147 and improvement in knowledge, skills, and attitudes towards the training experience (16).  
148 This level is usually measured using a pre- and post-test assessment questionnaire (La  
149 Duke, 2017); 3) behaviour, which determines whether the training resulted in  
150 improvement in practice at the workplace; and 4) results: this assesses the overall impact  
151 of the training programme based on the programme objectives and it determines the cost-  
152 effectiveness of the training programme, improved quality, client satisfaction, as well as  
153 improved productivity. The study assessed only two levels of the Kirkpatrick model: 1)  
154 level 1 (acceptability and feasibility of the ANC-PNC blended learning approach) 2) level 2  
155 (change in knowledge). A third objective beyond the scope of the Kirkpatrick model was  
156 added to 3) describe the cost of developing and implementing the blended learning training  
157 and the implementation costs was compared with that for the face-to-face only approach.

### 158 **Recruitment and sampling**

159 A total of 89 healthcare professionals from Nigeria, Kenya, and Tanzania, were purposively  
160 selected from health care facilities agreed with the Ministry of Health in each country to

161 participate in the ANC-PNC blended learning course and feasibility study. The sample of  
162 89 participants falls within the recommended sample size of at least 70 for a pilot or  
163 feasibility study, to reduce the imprecision around the estimate of the standard deviation  
164 (17). The criteria for inclusion in the feasibility study consisted of health facilities in the  
165 implementation program areas, healthcare professionals involved in the provision of  
166 antenatal or postnatal care services in the identified health facilities and consent for taking  
167 part in the blended learning and/or data gathering activities. The cadres selected consisted  
168 of nurses, midwives, clinical officers, medical officers, and community health workers from  
169 rural and urban health facilities (Table 1). The exclusion criteria involved healthcare  
170 professionals who did not undertake the ANC-PNC blended learning course and anyone not  
171 providing consent to take part in the study.

## 172 **Qualitative methods and analysis**

173 Eight focus group discussions (FGDs) and nine key informant interviews (KIIs) were held  
174 after the ANC-PNC BL course in October 2022. KIIs lasted for thirty minutes and FGDs for  
175 60 minutes. In Nigeria, two focus group discussions were held with nurse-midwives and  
176 community health workers separately to allow the participants to freely share their views.  
177 In Kenya and Tanzania three FGDs were held in each country. The FGDs were mixed as  
178 per the request of the health workers who chose to stay in their learning groups whilst  
179 sharing experiences of the blended learning approach. Three key informant interviews  
180 were held with participants from each of the study sites and considered adequate after  
181 obtaining saturation. A semi-structured topic guide was used to guide discussions in the  
182 KIIs and FGDs. All interviews were audio recorded with permission from the participants  
183 and transcribed verbatim into English. KIIs and FGDs were helpful in eliciting information  
184 on perceptions and experiences of the blended learning approach and ANC-PNC course  
185 content (18).

186 Preparation for qualitative data analysis involved a rigorous process of transcription, data  
187 reduction (coding) and theme development (19). Qualitative data was analysed in NVIVO-  
188 O 12 software using inductive thematic analysis by Braun and Clarke (2006); a)

189 familiarising oneself with the data through transcription and reading transcripts; b)  
190 generating initial codes; c) searching for themes; d) reviewing themes; e) defining and  
191 naming themes; and g) writing findings/producing a report. Pseudonyms were used to  
192 maintain confidentiality in the study. Trustworthiness was achieved by using a criterion for  
193 thematic analysis; returning to the data repeatedly to check for accuracy in interpretation;  
194 discussions with the study team with expertise in midwifery, blended learning, and mixed  
195 methods research (18).

## 196 **Quantitative methods and analysis**

197 Quantitative data was collected in two phases, 1) Knowledge through an online  
198 questionnaire in August and, 2) skills assessments in October 2022 after the final part of  
199 the BL course. For the face-to-face component, each participant was asked to complete a  
200 knowledge assessment (MCQs) and two OSCEs (breastfeeding and insertion of an IUD)  
201 before starting training and immediately after training. The same tools were used by all  
202 participants on both occasions. All questionnaires were completed anonymously. Changes  
203 in percentage scores are constrained by the pre-training score, with those scoring well  
204 having less capacity for improvement than those scoring poorly. To account for this in  
205 analysis, the improvement percentage score (IPS) was derived as follows:

$$206 \quad \text{IPS} = (P_2 - P_1) * 100 / (M - P_1) \text{ if } P_2 \geq P_1$$

$$207 \quad (P_2 - P_1) * 100 / P_1 \text{ if } P_2 < P_1$$

208 where:  $P_1$  denotes the pre-training percentage score;  $P_2$  denotes the post-training  
209 percentage score, and  $M$  denotes the maximum possible score (100 for knowledge and 20  
210 for OSCEs). For each type of assessment, analysis of covariance (ANCOVA) was then used  
211 to analyse the improvement percentage scores, with pre-training scores as the covariate  
212 and factors for each country. The 5% significance level was used to determine statistical  
213 significance. Means are reported with 95% confidence intervals.

## 214 **Cost analysis**



215 The cost analysis considered both the design costs of the BL training package as well as  
216 the cost of implementation in each country. For Tanzania, costs were reported separately  
217 for the BL training implemented in Dodoma and Zanzibar. To calculate the full economic  
218 cost of the BL training packages, both the perspectives of the designer and implementers  
219 of the training and the costs of the recipients of the course were considered. For the  
220 recipients of the BL training, the labor cost of HCPs participating in the training was  
221 calculated by multiplying the time spent overall to attend the different components of the  
222 training package times the average salary of their role and level. For the costs of the  
223 implementer of the training, economic costs for both the design and the implementation  
224 of the BL training package were reported, grouped by resource categories which included  
225 direct and indirect costs. Direct costs included costs for direct labor, per-diems and travel  
226 allowances, costs for face-to-face events (e.g., workshop venues, catering), transport  
227 costs, and printing of training materials. For the implementation in each country indirect  
228 costs such as indirect labour, use of capital and overheads were assumed to be 7% of the  
229 total direct costs.

230 Costs were reported as the total cost of design of the BL training and the cost of  
231 implementation in each country. For the latter, the total cost per participant was also  
232 calculated. All costs were converted from local currencies to 2021 USD. Conversion factors  
233 were taken from the World Bank and were equal to 0.73 for GBPs, 109.64 for Kenyan  
234 Shillings, 2,297.76 for Tanzania Shillings and 358.81 for Nigerian Naira.

## 235 **Results**

### 236 **Quantitative findings**

#### 237 *Characteristics of participants and access to training platform*

238 Of the 89 participants selected for the study, only 74 (83%) completed the self-directed  
239 learning component of the blended learning course whilst 80 participants completed the  
240 facilitated virtual component (delivered via zoom), and 89 health workers completed the  
241 face-to-face component.

242 The demographic characteristics of the participants in the self-directed learning are shown  
 243 in table 1. Overall, a majority (73%) of the 74 participants were females and 49% were  
 244 providing healthcare in urban settings. The cadre of participants included nurse midwives  
 245 (42%), doctors (28%) and clinical officers (20%).

246 **Table 1: Characteristics of participants by country**

| <b>Characteristic / category</b> | <b>Kenya (n=29)</b> | <b>Nigeria(n=18)</b> | <b>Tanzania (n=27)</b> | <b>All (n=74)</b> |
|----------------------------------|---------------------|----------------------|------------------------|-------------------|
| <b>Gender</b>                    |                     |                      |                        |                   |
| Male                             | 24%                 | 44%                  | 7%                     | 23%               |
| Female                           | 66%                 | 56%                  | 93%                    | 73%               |
| Other (not mentioned)            | 10%                 | 0%                   | 0%                     | 4%                |
| <b>Location</b>                  |                     |                      |                        |                   |
| Rural                            | 59%                 | 22%                  | 52%                    | 47%               |
| Urban                            | 31%                 | 78%                  | 48%                    | 49%               |
| Other (not mentioned)            | 10%                 | 0%                   | 0%                     | 4%                |
| <b>Health worker cadre</b>       |                     |                      |                        |                   |
| Doctor                           | 14%                 | 50%                  | 30%                    | 28%               |
| Nurse-midwife                    | 52%                 | 11%                  | 52%                    | 42%               |
| Clinical Officer                 | 31%                 | 11%                  | 15%                    | 20%               |
| Community Health Worker          | 0%                  | 28%                  | 4%                     | 8%                |
| Other (not mentioned)            | 3%                  | 0%                   | 0%                     | 1%                |

247

248 The average time to completion of the self-directed learning component was 16 hours,  
 249 IQR (8, 30). The participant owned mobile phone was the most used device (86% vs.

250 14%) compared to other devices. Most of the participants (58%) joined the live zoom  
251 sessions from the health facilities whilst 27% joined from their homes.

## 252 **Outcome of knowledge and skills assessment**

### 253 *Outcome of knowledge*

254 Data were received for 72 trainees with pre and post test scores: 29 from Kenya, 21 from  
255 Nigeria, 28 from Tanzania. Two trainees did not have post-test scores and were therefore  
256 excluded from the analysis. Data for knowledge assessment on one occasion was not  
257 received for two participants in Kenya (post- training), three participants in Nigeria (pre-  
258 training) and 1 participant in Tanzania (pre- training). Data for all OSCEs was missing for  
259 5 participants in Nigeria and on one occasion for the Breast feeding OSCE for Tanzania.  
260 Knowledge was assessed in 72 participants both before and after training. In each country,  
261 the mean knowledge score before training was between 60% and 70% (Table 2) and the  
262 individual scores ranged between 40% and 87%. Overall, the mean (95% CI) absolute  
263 improvement in scores was 10% (7%,13%) and the mean (95% CI) percentage  
264 improvement was 27% (21%,34%); on both scales, the mean improvements observed  
265 for Kenya and Nigeria were larger than in Tanzania. ANCOVA of the percentage  
266 improvement scores found statistically significant evidence that the higher the baseline  
267 score the smaller the percentage improvement score was ( $p=0.001$ , Table 3) and that  
268 there were significant differences between countries ( $p=0.003$ ). For Tanzania, the  
269 percentage improvement was statistically significantly smaller than for Kenya ( $p=0.002$ )  
270 whereas there was no significant difference between Nigeria and Kenya.

### 271 *Outcome skills assessment*

272 The breastfeeding OSCE was completed by 49 participants both before and after training.  
273 In each country, the mean percentage score before training was between 46% and 52%  
274 and individual OSCE scores were between 30% and 75% (Table 3). Overall, the mean  
275 (95% CI) absolute improvement in scores was 31% (27%,35%) and the mean (95% CI)  
276 percentage improvement score was 62% (55%,69%). ANCOVA did not find evidence that

277 the pre-training score had any effect on the percentage improvement scores ( $p=0.84$ ,  
 278 Table 3). No statistically significant differences were detected between the countries  
 279 ( $p=0.21$ ).

280 The insertion of IUD OSCE was completed by 50 participants both before and after training.  
 281 There were substantial differences in score between country before training, with the mean  
 282 (SD) score for Kenya being 17% (10%) whereas for Nigeria, the mean was 54% (24%)  
 283 (Table 2). Individual percentage scores ranged between 0% and 95%. After training, the  
 284 mean scores for the three countries were more similar, ranging between 82% and 94%.  
 285 Overall, the mean (95% CI) absolute improvement in scores was 50% (42%,58%) and  
 286 the mean (95% CI) percentage improvement was 72% (64%,80%). ANCOVA of the  
 287 percentage improvement scores found statistically significant evidence that the higher the  
 288 baseline score the smaller the percentage improvement score was ( $p<0.001$ , Table 3), but  
 289 there were no significant differences between the three countries ( $p=0.13$ ).

290 **Table 2: Summary of changes in scores, by country**

| Score for           | Country      | Pre-training |                 | Post-training |                | Number assessed on both occasions | Mean absolute (95% CI) improvement | Mean percentage (95% CI) improvement |
|---------------------|--------------|--------------|-----------------|---------------|----------------|-----------------------------------|------------------------------------|--------------------------------------|
|                     |              | n            | Mean score (SD) | n             | Mean score (n) |                                   |                                    |                                      |
| Knowledge           | Kenya        | 29           | 66 (8)          | 27            | 78 (9)         | 27                                | 12 (8,16)                          | 35 (25,45)                           |
|                     | Nigeria      | 18           | 70 (11)         | 21            | 77 (20)        | 18                                | 10 (4,16)                          | 31 (17,46)                           |
|                     | Tanzania     | 27           | 61 (10)         | 28            | 68 (11)        | 27                                | 7 (1,13)                           | 17 (5,30)                            |
|                     | <b>Total</b> | <b>74</b>    | <b>65 (10)</b>  | <b>76</b>     | <b>74 (14)</b> | <b>72</b>                         | <b>10 (7,13)</b>                   | <b>27 (21,34)</b>                    |
| Breast-feeding OSCE | Kenya        | 15           | 51 (14)         | 15            | 85 (11)        | 15                                | 34 (27,41)                         | 70 (61,80)                           |
|                     | Nigeria      | 15           | 52 (9)          | 15            | 82 (10)        | 15                                | 30 (24,35)                         | 63 (52,74)                           |
|                     | Tanzania     | 19           | 46 (10)         | 20            | 76 (15)        | 19                                | 30 (21,38)                         | 54 (39,70)                           |
|                     | <b>Total</b> | <b>49</b>    | <b>49 (11)</b>  | <b>50</b>     | <b>80 (13)</b> | <b>49</b>                         | <b>31 (27,35)</b>                  | <b>62 (55,69)</b>                    |
|                     | Kenya        | 15           | 17 (10)         | 15            | 94 (4)         | 15                                | 77 (72,83)                         | 93 (90,96)                           |
|                     | Nigeria      | 15           | 54 (24)         | 15            | 87 (7)         | 15                                | 33 (20,46)                         | 63 (45,82)                           |

|                       |              |           |                |           |               |           |                   |                   |
|-----------------------|--------------|-----------|----------------|-----------|---------------|-----------|-------------------|-------------------|
| Insertion of IUD OSCE | Tanzania     | 20        | 39 (26)        | 20        | 82 (9)        | 20        | 43 (31,56)        | 63 (50,77)        |
|                       | <b>Total</b> | <b>50</b> | <b>37 (27)</b> | <b>50</b> | <b>87 (9)</b> | <b>50</b> | <b>50 (42,58)</b> | <b>72 (64,80)</b> |

291

292 **Table 3: Estimates from analyses of covariance of improvement percentage**  
 293 **scores**

|                                    | Knowledge               |         | Breastfeeding OSCE   |         | Insertion of IUD OSCE   |         |
|------------------------------------|-------------------------|---------|----------------------|---------|-------------------------|---------|
|                                    | Estimate (95% CI)       | p-value | Estimate (95% CI)    | p-value | Estimate (95% CI)       | p-value |
| <b>Constant</b>                    | 114.2<br>(69.4,159.0)   |         | 67.0<br>(30.8,103)   |         | 104.6<br>(92.8,116)     |         |
| <b>Pre-training coefficient</b>    | -1.20<br>(-1.87, -0.54) | 0.001   | 0.07<br>(-0.60,0.73) | 0.84    | -0.71<br>(-0.98, -0.44) | <0.001  |
| <b>Variation between countries</b> |                         | 0.003   |                      | 0.21    |                         | 0.13    |
| <b>Nigeria v Kenya</b>             | 1.66<br>(-14.8,18.1)    | 0.84    | -7.4<br>(-25.5,10.7) | 0.42    | -2.7<br>(-21.1,15.8)    | 0.77    |
| <b>Tanzania v Kenya</b>            | -23.7<br>(-38.5, -8.9)  | 0.002   | -15.6<br>(-33.0,1.9) | 0.08    | -13.8<br>(-29.3,1.7)    | 0.08    |

294

295 **Cost of designing and implementing the BL training approach**

296 The cost of designing the BL training package was estimated at USD 22,749 and was  
 297 mostly determined by labor costs for designing the BL format (200 person hours in total)  
 298 and coordinating meetings for subsequent implementation in each country (Approximately  
 299 24 person hours in total for the 4 implementation sites) (Table 4).

300

301

302

303

304 **Table 4: Costs of designing the blended learning training package (USD)**

|                                                             | Quantity | Unit cost | Total cost    |
|-------------------------------------------------------------|----------|-----------|---------------|
| <b>Design of BL training package</b>                        |          |           |               |
| <b>Labor costs</b>                                          |          |           |               |
| Packaging of course content into BL format (person hours)   | 200      | 42        | 8,400         |
| Recording of lectures (person hours)                        | 20       | 52        | 1,040         |
| Planning meetings for roll out of BL course (person hours)  | 96       | 40        | 3,853         |
| <b>Equipment</b>                                            |          |           |               |
| Direct WCEA platform design costs for SDL component (units) | 1        | 7,968     | 7,968         |
| <b>Overheads (7% of direct costs)</b>                       |          |           | 1,488         |
| <b>Total</b>                                                |          |           | <b>22,749</b> |

305

306 Roll out costs were equal to USD 15,773; 13,525; 25,804 and 25,152 respectively in  
 307 Tanzania-Dodoma, Tanzania-Zanzibar, Kenya, and Nigeria (Table 5). Most of this cost was  
 308 incurred by the implementers (Direct costs) of the BL training, accounting for 90.10%,  
 309 92.16%, 71.74% and 80.18% of total costs respectively in the four implementation sites,  
 310 whereas the reminder cost was related to the time spent by participants to attend the  
 311 course. With the only exception of Zanzibar, the total cost per participant was similar in  
 312 the other implementation sites and ranged between USD 830 in Dodoma and USD 860 in  
 313 Kenya when considering both costs of implementers and participants, or between USD 624  
 314 and USD 759 when considering only the costs to the implementers. In Zanzibar, the cost  
 315 per participant was higher, at USD 1,353 (USD 1,267 when considering only direct costs  
 316 (the costs to the implementers), due to the smaller number of participants and the higher  
 317 incidence of fixed costs.

318 Of the total costs to the implementer (Direct costs), costs for DSA, accommodation and  
 319 other allowances were the major cost driver accounting for respectively 30% in Dodoma,  
 320 34% in Zanzibar, 40% in Kenya and 36% in Nigeria. Labour costs were the second highest  
 321 cost driver in all implementation sites, accounting in a range from 23% to 25% of the total  
 322 cost in the four implementation sites. Other relevant costs were transportation fees in

323 Tanzania (respectively 15% and 24% of the total cost in Dodoma and Zanzibar) and  
 324 Nigeria (11% of the total cost), the cost for venues and catering for workshop/conferences  
 325 in Nigeria (13% of the total cost), and the cost for airtime data bundles in Kenya (11% of  
 326 the total cost).

327 **Table 5: Costs of rolling out the BL training package (USD)**

| Implementing country                                                           | Tanzania      |               | Kenya         | Nigeria       |
|--------------------------------------------------------------------------------|---------------|---------------|---------------|---------------|
|                                                                                | Dodoma        | Zanzibar      |               |               |
| <b>No. of Participants</b>                                                     | <b>19</b>     | <b>10</b>     | <b>30</b>     | <b>30</b>     |
| <b>Resource category</b>                                                       |               |               |               |               |
| <b>Cost for the recipients of the BL training package</b>                      |               |               |               |               |
| Cost of trainee's time                                                         | 1,586         | 1,078         | 7,376         | 4,984         |
| <b>Total for the recipients of the BL training package</b>                     | <b>1,586</b>  | <b>1,078</b>  | <b>7,376</b>  | <b>4,984</b>  |
| <b>Cost for the implementer of the BL training package</b>                     |               |               |               |               |
| Staff and Faculty cost for support during SDL and zoom sessions                | 1,116         | 587           | 1,762         | 1,762         |
| Staff and Faculty cost during F2F sessions                                     | 2,283         | 2,623         | 2,538         | 2,996         |
| Resource fees and honoraria                                                    | 1,110         | 124           | 883           | 822           |
| DSA, accommodation, and other allowances                                       | 4,359         | 4,319         | 7,436         | 7,246         |
| Transportation fees                                                            | 2,093         | 3,022         | 125           | 2,252         |
| Printing, stationery costs and other consumables                               | 474           | 155           | 1,120         | 265           |
| Airtime (data bundles)                                                         | 651           | 341           | 2,008         | 920           |
| Venues and catering for workshop/conferences                                   | 1,175         | 462           | 1,350         | 2,586         |
| Overheads and indirect costs (7% of total cost)                                | 928           | 814           | 1,206         | 1,319         |
| <b>Total for the implementers of the BL training package</b>                   | <b>14,187</b> | <b>12,447</b> | <b>18,428</b> | <b>20,168</b> |
| <b>Total Cost</b>                                                              | <b>15,773</b> | <b>13,525</b> | <b>25,804</b> | <b>25,152</b> |
| <b>Total cost per participant-Direct costs (only costs to the implementer)</b> | <b>759</b>    | <b>1267</b>   | <b>624</b>    | <b>672</b>    |
| <b>Total cost per participant (implementer + course recipients)</b>            | <b>830</b>    | <b>1,353</b>  | <b>860</b>    | <b>838</b>    |

328

329 The F2F component of the training package accounted for 66.7% to 86.8% of the total  
 330 costs to the direct costs in the four sites (Table 6).

331 **Table 6: Cost by component of the BL training package (USD) and % incidence**  
 332 **over total implementer cost**

| Implementing country    | Tanzania                          |                  |                                   |                  | Kenya                             |                  | Nigeria                           |                  |
|-------------------------|-----------------------------------|------------------|-----------------------------------|------------------|-----------------------------------|------------------|-----------------------------------|------------------|
|                         | Dodoma                            |                  | Zanzibar                          |                  | Nakuru                            |                  | Oyo State -BL                     |                  |
|                         | Total cost (cost per participant) | % total BL costs | Total cost (cost per participant) | % total BL costs | Total cost (cost per participant) | % total BL costs | Total cost (cost per participant) | % total BL costs |
| <b>F2F</b>              | 10,938 (576)                      | 82.5 %           | 10,102 (1010)                     | 86.8 %           | 11,485 (383)                      | 66.7 %           | 14,710 (490)                      | 78.0 %           |
| <b>SDL</b>              | 1,492 (79)                        | 11.2 %           | 889 (89)                          | 7.6 %            | 3,362 (112)                       | 19.5 %           | 2,236 (75)                        | 11.9 %           |
| <b>Virtual Learning</b> | 830 (44)                          | 6.3 %            | 642 (64)                          | 5.5 %            | 2,375 (79)                        | 13.8 %           | 1,902 (63)                        | 10.1 %           |
| <b>Total BL costs</b>   | 13,259 (698)                      | 100.0 %          | 11,633 (1163)                     | 100.0 %          | 17,222 (574)                      | 100.0 %          | 18,849 (628)                      | 100.0 %          |

333  
 334  
 335  
 336  
 337  
 338  
 339  
 340  
 341  
 342  
 343  
 344  
 345



346 **Table 7: Implementation costs of the 5-day face-to-face training package in**  
 347 **Kenya and Nigeria (USD)**

|                                                                   | <b>Kenya</b>                            | <b>Nigeria</b>                          |
|-------------------------------------------------------------------|-----------------------------------------|-----------------------------------------|
| <b>No. of Participants</b>                                        | 30                                      | 30                                      |
| <b>Cost for the implementer of the 5-day F2F training package</b> |                                         |                                         |
| <b>Resource category</b>                                          | <b>Total Cost<br/>(Cost per person)</b> | <b>Total Cost<br/>(Cost per person)</b> |
| Staff cost during face-to-face sessions                           | 6,854 (228)                             | 4,585 (153)                             |
| <b>Total labor costs</b>                                          | <b>6,854 (228)</b>                      | <b>4,585 (153)</b>                      |
| Resource fees and honoraria                                       | 1,198 (40)                              | 456 (15)                                |
| DSA, accommodation and other allowances                           | 14,046 (468)                            | 13,856 (462)                            |
| Transportation fees                                               | 2,380 (79)                              | 182 (6)                                 |
| Printing, stationery costs and other consumables                  | 139 (5)                                 | 2,301 (77)                              |
| Venues and catering for workshop/conferences                      | 7,469 (249)                             | 4,104 (137)                             |
| Overheads and indirect costs (7% of total cost)                   | 2,246 (75)                              | 1,784 (59)                              |
| <b>Total for the implementers of the BL training package</b>      | <b>34,333 (1144)</b>                    | <b>27,270 (909)</b>                     |

348

349

350 **Qualitative findings**

351 The analysis of the qualitative data generated three themes about the BLA: 1) general  
 352 perceptions on the approach; 2) challenges participating; 3) recommendations improving  
 353 the BLA.

354 **1) Perceptions on the blended learning training approach**

355 **Inclusive learning**

356 All participants loved the blended learning approach to training in ANC-PNC across all the  
 357 health worker cadres in Nigeria, Kenya, and Tanzania. It was a new training approach with  
 358 diverse learning methods that caters to a variety of learners, as highlighted in this extract.

359 *"The blended course was a new and interesting learning process. Everyone is learning at*  
360 *every part of that training. Someone who is not good at reading on their own could*  
361 *complement the part in the zoom session. And those who could not comprehend the zoom*  
362 *session would complement on the face-to-face. We appreciate it because we are learning*  
363 *both on our own and being facilitated face to face. It was a good experience, and I liked*  
364 *it."* **Clinical officer 2, Kenya**

365 Participants appreciated the three learning parts of the blended learning course which was  
366 inclusive and created opportunities for all learners to grasp the course content through  
367 self-study and facilitated sessions.

### 368 **Alternative to classroom-based learning**

369 Participants reflected on their experiences of learning during the ANC-PNC blended  
370 learning course as an eye opener to other modes of learning.

371 *The blended training is an eye opener that one can still learn even when not in the class.*  
372 *"I did not have issues with the network. So, all the lectures I was able to participate, some*  
373 *of them I would be driving and listening [audio recordings in self-directed learning]. It*  
374 *saved my time, and I was able to work. It is interesting and helpful."* **Nurse midwife 1,**  
375 **Nigeria**

376 The ANC-PNC blended learning course is flexible, time saving, convenient and causes less  
377 disruption to work.

### 378 **Blended learning sequence**

379 Participants loved the learning sequence of theoretical concepts/knowledge preceding the  
380 face-to-face component. The online sessions provided an overview of the entire course  
381 highlighting topics which would be covered in each of the three parts of the blended  
382 learning course.

383 *"This program [training] is very nice because you come to face-to-face session when you*  
384 *know the content. Already you have read for yourself at home or at your workplace and*

385 *have an idea of what you are going to do unlike other programs. That's what was*  
386 *interesting about the program."* **Doctor 1, Kenya**

387 Providing a course overview enabled the participants to know what to expect during the  
388 self-directed learning, zoom and face-to face components.

### 389 **Educative course content**

390 The course content was noted as highly educative, well-structured, and very helpful in  
391 addressing gaps in ANC-PNC service provision that would contribute to improving the  
392 quality of maternity care in the three countries.

393 *"I want to really appreciate the organizers of this program because it was well planned,*  
394 *they really looked into the problem that we were facing as nurses and health workers and*  
395 *they tried to find solutions, like this respectful maternity care."* **Nurse midwife 4,**  
396 **Nigeria.**

397 During the zoom and face-to-face sessions, facilitators reinforced the need for health  
398 workers to provide respectful maternity care for women and families to improve on uptake  
399 of maternity services/health facility deliveries. Participants reflected on their health  
400 practice considering the knowledge and skills obtained from the course and mentioned  
401 several areas of improvement such as respectful maternity care, TB screening,  
402 documentation, referral, postnatal care, and mental health screening.

### 403 **Target audience/mixing of health worker cadres**

404 Consistent with the team approach to care provision, the ANC-PNC blended learning course  
405 included all health worker cadre providing ANC-PNC services.

406 *"We also want to appreciate LSTM and the ministry [of health] for how they picked the*  
407 *participants across the cadres like the nurses, clinical officers, medical officers, which was*  
408 *a perfect one. Often with ANC (Antenatal Care) and PNC (Postnatal Care), it has been*  
409 *viewed as a nursing profession, but LSTM has done well to enlighten the other cadres and*  
410 *have everybody participating in the management of these mothers."* **Nurse 7, Kenya.**

411 Participants were thankful for the unrestricted selection of learners across the health  
412 worker cadres which reinforced the need for teamwork in ANC-PNC service provision.

### 413 **Mode of delivery**

414 Participants reported that the Face-to-face sessions were most popular because they were  
415 hands-on to improve skills, allowed sharing of perspectives/experiences from different  
416 cadres, ensured maximum interaction with facilitators, and were conducted in an  
417 environment with no distractions that facilitated full concentration during the training.

418 *"The phase which I understood the most and I got a lot of things was the face to face. For*  
419 *example, when I was reading through self-directed method, I was alone and there is no*  
420 *one to ask, but in face to face when I fail to understand something I just ask a teacher*  
421 *because they are present, also through this method I was practicing and sharing with my*  
422 *colleagues."* **Nurse midwife 9, Dodoma-Tanzania**

423 The self-directed learning component received mixed views with some participants  
424 suggesting it was worthwhile to engage in self-study at own pace and timing whilst others  
425 missed the interactive experience with peers and facilitators. Internet challenges and work  
426 commitments affected virtual learning making it the least liked component of the ANC-  
427 PNC blended learning course.

### 428 **Planned behaviour**

429 Participants shared topics that were intriguing and what they planned to do differently to  
430 improve on quality of maternity care in the health facilities where they worked in the  
431 extracts below.

432 *"I realize we have not been doing good respectful maternity care. I will approach the*  
433 *health facility management committee so that we have a table, where we can receive our*  
434 *mothers, take proper history, because we have just been asking them through the window*  
435 *which is not good as there is no privacy"* **Nurse midwife 5, Kenya.**

436 "I wish to improve on referral in our health facility as we do not have that referral form  
437 [SBAR (Situation Background Assessment Recommendation)]. What we have is not  
438 customized to SBAR as per guidelines. I would have to advocate to print the SBAR form  
439 and other documents including the whooleys and the Edinburgh [mental health screening  
440 tools]," **Clinical officer 10, Kenya.**

441 Participants reflected on their health practice considering the knowledge and skills  
442 obtained from the course and mentioned several areas of improvement such as respectful  
443 maternity care, referral & documentation systems, TB screening, postnatal care, and  
444 mental health screening.

## 445 **2) Challenges**

446 Challenges experienced by participants in the three countries were similar despite different  
447 contexts and level of training such as the use of the WCEA online platform during the self-  
448 directed learning, use of zoom, internet connectivity, and work commitments during the  
449 virtual facilitated sessions.

### 450 **Use of the WCEA platform**

451 Participants experienced challenges with logging in to the WCEA platform to access the  
452 resources during the start of the self-directed learning. The log in challenges were related  
453 to incorrect passwords and how to navigate through the resources on the WCEA platform.

454 "The challenge I found is on the internet [self-directed learning] because I didn't know  
455 how to log in or how to search for notes, but I am thankful to a member of the [WhatsApp]  
456 group. We sat together and she taught me until I understood, when I returned home, I  
457 could study by myself." **Nurse midwife 6, Zanzibar-Tanzania.**

458 A WhatsApp group was created for participants in the three countries for communication  
459 purposes and to resolve challenges in real time. The WhatsApp groups also served as an  
460 interaction space for the participants to provide peer-to-peer support in completing the  
461 self-directed learning component of the course.

462 **Work commitments**

463 Zoom sessions were delivered in the afternoon for 2.5 hours in anticipation that health  
464 workers would use the morning hours to work in the ANC/PNC clinics, this was to minimise  
465 disruptions to service provision. The time was pragmatically adjusted in each context  
466 based on the clinic schedule.

467 *"The challenge I faced is the same as my colleagues, zoom session time, most of time it*  
468 *starts at 1PM its time in which you may be handing over the report or there are many*  
469 *clients."* **Nurse midwife 3, Dodoma-Tanzania.**

470 *"On the first day, I was still seeing patients about 45 minutes into the Zoom sessions. It*  
471 *would be very good if the zoom should happen between 5pm and 7pm after work".* **Doctor**  
472 **1, Kenya.**

473 Initially, the scheduling of the zoom sessions coincided with busy times at the health  
474 facilities which became a challenge for some health workers to actively participate in the  
475 discussions, however, lessons were learnt from the experience and the schedule adjusted  
476 to minimise any disruptions to service delivery.

477 **Internet connectivity issues**

478 Poor internet posed a challenge for some participants joining the facilitated virtual sessions  
479 from remote areas and changes in weather patterns (torrential rain).

480 *"During the zoom session, we have a change in the weather and the network starts*  
481 *fluctuating and misbehaving. I was lost during some of the lectures..."* **Nurse midwife 7,**  
482 **Nigeria.**

483 Internet connectivity issues affected learning during the facilitated virtual sessions as  
484 participants would drop off from the Zoom sessions and try to reconnect once internet  
485 connection is restored.

486 **Language barrier**

487 Language barrier was a challenge unique to participants from Tanzania during the zoom  
488 sessions. Zoom sessions were facilitated in English, however, participants were more  
489 fluent in Swahili, a national language which limited interactions on day 1. The language  
490 issue was resolved on day two and three with facilitators using Swahili to facilitate the  
491 discussions. Lessons were learnt from the zoom experience and implemented in the face-  
492 to-face component of the blended learning course.

### 493 **3) Recommendations for the roll out of the ANC-PNC blended learning course**

494 Participants were asked to share suggestions to improve the implementation of the ANC-  
495 PNC blended learning course. Most participants gave suggestions for all future in-house  
496 trainings in maternity services to be adapted to a blended learning format due to the  
497 learning techniques which were considered fun and supported active learning such as  
498 group discussions, breakout sessions and role plays.

499 *The course delivery was wonderful because we were required to be active and participate*  
500 *fully in small groups. Other courses most of the time, have lectures which just make us*  
501 *sleepy. Other trainings should follow this type of method which we were using of blended*  
502 *learning.* **Nurse 5, Dodoma-Tanzania**

503 Participants suggested a comprehensive induction to the blended learning course covering  
504 aspects such as use of zoom and WCEA platform. Notable in the recommendations were  
505 how to address the implementation gaps experienced in the virtual facilitated component  
506 of the blended learning course: 1) schedule zoom sessions in the evening/after work hours  
507 or over the weekend; 2) seek official permission and communication from health leaders  
508 to enable health workers participate; and 3) record live sessions to mitigate internet  
509 connectivity challenges.

### 510 **Discussion**

511 This study sought to evaluate the feasibility of implementing the ANC-PNC blended  
512 learning course in low resource settings. An emphasis was placed on eliciting views on

513 experiences/acceptability of the blended learning approach and identifying proactive  
514 strategies to improve future course implementation in LMICs settings. This study is unique  
515 because it used a flipped classroom (theoretical concepts preceded the practical skills)  
516 mode of the BL approach which enhanced active participation and learning to in-service  
517 training for frontline health professionals involved in the provision of ANC-PNC services in  
518 low resource settings (20).

### 519 **Acceptability/feasibility of the blended learning approach**

520 The blended learning approach to training in ANC-PNC was found to be acceptable and  
521 feasible to implement in the study settings. A multi-disciplinary cohort of doctors, nurses/  
522 nurse-midwives, clinical officers, and community health workers completed the blended  
523 learning course. Most participants accessed online sessions (self-directed learning and  
524 virtual facilitated sessions) using their phones from home or health facilities. Participants  
525 liked the blended learning approach due to its flexibility in learning, highly relevant/  
526 educative content, less time spent away from work and link to CPD (Continuous  
527 Professional Development) points. Aspects that were noted as challenging were related to  
528 personal log-in details and network connectivity issues during the self-directed learning  
529 and virtual facilitated sessions, respectively.

### 530 **Knowledge and skills**

531 Findings from this study indicate that the antenatal and postnatal care blended learning  
532 course was successful in improving the knowledge and skills of healthcare providers,  
533 immediately after the training compared to before. Participants reported improvements in  
534 knowledge on topics such as, respectful maternity care, referral systems, integration of  
535 HIV, TB, and Malaria services in ANC-PNC. In addition, participants mentioned the  
536 acquisition of new skills on postnatal IUCD insertion, breastfeeding, mental  
537 health/domestic violence screening. The knowledge and skills obtained from this course  
538 will be used to improve quality of integrated ANC-PNC care in health facilities where  
539 participants work. Results from this study are consistent with other studies reporting on



540 the effectiveness of blended learning in enhancing knowledge acquisition among health  
541 professionals (21, 22). A study by Ameh et al 2019 reported that short competency-based  
542 trainings in maternity care led to significant improvements in health worker competence  
543 and changes in clinical practice (4).

#### 544 **Costs**

545 The cost of the BL learning package to the implementer in the four implementation sites  
546 were similar in Dodoma region of Tanzania, Kenya, and Nigeria, and ranged between USD  
547 624 and USD 759. In Zanzibar, the cost per participant was higher mostly due to the small  
548 number of participants which increased the share of fixed cost for each participant, such  
549 as trainer/faculty transportation fees, daily subsistence allowance (DSA), and  
550 accommodation costs. In all implementation sites, the F2F component accounted for most  
551 costs, in a range between 67% and 87% of the total cost. In Nigeria and Kenya, the direct  
552 cost per participant of the BL training package were lower than the cost for delivering a  
553 full 5-day F2F training which was estimated at USD 1,144 per participant in Kenya and  
554 USD 909 in Nigeria, respectively 83% and 35% higher compared to the BL package. (Table  
555 7).

#### 556 **Strengths and Limitations of the study**

557 This study provides insights into the implementation of a blended learning approach to in-  
558 service training in low resource settings. The feasibility study was conducted in a multi-  
559 country and multi-site context which provided opportunities for learning across the three  
560 countries as well as specific in-country experiences. The mixed methods study enhanced  
561 triangulation of findings and enabled the capturing of broad perspectives helpful in  
562 strengthening implementation of the BL approach. The self-directed learning component  
563 of the BL training is hosted on the WCEA platform which is accessible to healthcare  
564 professionals in over 40 countries in sub-Saharan Africa and accredited for continuous  
565 professional development. The BL approach was estimated to be cost saving compared to  
566 the F2F approach. Costing the BL approach increases the likelihood for adoption by policy  
567 makers.

568 The authors acknowledge some limitations, for example, the small sample of 89  
569 participants which may not be generalizable to other contexts although the participants  
570 were drawn from a varied context and the sample size is within acceptable size for  
571 feasibility studies (14). This study evaluated the difference in costs between the BL and  
572 full F2F training approaches, however, it did not report on the potential differences in  
573 efficacy in reaching the intended outcomes nor the impact on the quality of care during  
574 offsite trainings. Further research is needed to understand the impact of BL trainings on  
575 quality of maternity care using the social return on investment (SROI) methodology which  
576 is recommended as a holistic approach for demonstrating value for money of interventions  
577 (23).

## 578 **Conclusion**

579 The blended learning approach to ANC-PNC in-service training was found to be acceptable  
580 and feasible to implement in low resource settings. The BL approach was successful in  
581 improving the knowledge and skills of healthcare providers who participated in the  
582 training. Further studies are required to evaluate cost effectiveness and health provider  
583 skills of blended learning approach.

## 584 **Abbreviations**

585 ANC: antenatal care, LMICs: low- and middle-income countries, LSTM: Liverpool School of  
586 Tropical Medicine, PNC: postnatal care, NACOSTI: National Commission for Science,  
587 Technology, and Innovation, MCQs: multiple choice questions, OSCEs: objective  
588 structured clinical examination, WCEA: World Continuing Education Alliance

## 589 **Acknowledgments**

590 The authors would like to thank Helen Allot for the invaluable contribution in the design of  
591 the ANC-PNC blended learning course. We would like to thank the Global Fund and Takeda  
592 Pharmaceutical Company Limited for funding the study. We are indebted to the health  
593 care professionals who participated in the ANC-PNC course and shared their experiences  
594 and ideas to strengthen future roll outs of the BL approach.

595 **Funding**

596 CA received funding from The Global Fund to Fight AIDS, Tuberculosis and Malaria with  
597 financing from Takeda Pharmaceutical Company Limited. Quality improvement of  
598 integrated HIV, TB and Malaria services in ANC and PNC. Grant Number: Framework  
599 Agreement 202100618. The funder had no role in the study design, data collection,  
600 analysis, and decisions to publish findings.

601 **Availability of data and materials**

602 Data generated from the mixed methods study is included in this paper. Additional data is  
603 available from the authors upon reasonable request.

604 **Authors' contributions**

605 LAN, MF, EU, KE, MC, RM, AC, conceived and designed the study. MH, NL, MR, BR, DS, BI,  
606 OOA, KL, KE, MC, RM, EU, NF, LAN implemented the ANC-PNC Blended learning course  
607 and data collection. MC extracted and prepared data for analysis. LAN analysed qualitative  
608 data and drafted the manuscript. SW provided expertise on quantitative data and analysis.  
609 CF, AT provided expertise on costing and analysis. All authors read and approved the final  
610 manuscript before submission. AC: Funding acquisition and overall academic  
611 responsibility.

612 **Ethics approval and consent to participate**

613 Ethical approval for this study was obtained from Research Ethics Committees at, Liverpool  
614 School of Tropical Medicine (ID:21-052), Nigeria (Ministry of Health Oyo State:  
615 AD13/479/44511), Kenya (Strathmore University: SU-IERC1171/21 and  
616 NACOSTI/P/21/13853), Tanzania (University of Dodoma: MA.84/261/02/`A`/25 and  
617 Zanzibar Health Research Institute: ZAHREC/04/PR/JUNE/2022/19). A written informed  
618 consent was obtained from each participant prior to participation in the study.

619 **Consent for publication**

620 Not applicable

621 **Competing interests**

622 The authors have declared that no competing interests exist.

623 **References**

- 624 1. World Health Organization. Trends in maternal mortality 2000 to 2020: Estimates  
625 by WHO, UNICEF, UNFPA, World Bank Group and UNDESA/Population Division 2023.  
626 Available from: <https://www.who.int/publications/i/item/9789240068759>.
- 627 2. United Nations. Sustainable Development Goals. New York: United Nations  
628 Department of Economic and Social Affairs; 2016 [23rd Nov 2019]. Available from:  
629 <https://sustainabledevelopment.un.org/sdg3#targets>.
- 630 3. United Nations. World Health Organization and United Nations Children's Fund.  
631 WHO/UNICEF joint database on SDG 3.1.2 Skilled Attendance at Birth 2021. Available  
632 from: <https://unstats.un.org/sdgs/indicators/database/>.
- 633 4. Say L, Chou D, Gemmill A, Tunçalp Ö, Moller A-B, Daniels J, et al. Global causes of  
634 maternal death: a WHO systematic analysis. The Lancet global health. 2014;2(6):e323-  
635 e33.
- 636 5. MOH (Kenya). Saving Mothers Lives 2017, First Confidential Report into Maternal  
637 Deaths in Kenya. 2017. Available from:  
638 [https://cmnh.lstmed.ac.uk/sites/default/files/content/centre-news-](https://cmnh.lstmed.ac.uk/sites/default/files/content/centre-news-articles/attachments/CEMD%20Main%20Report%20Sept%203%20FINAL-%20Full%20Report.pdf)  
639 [articles/attachments/CEMD%20Main%20Report%20Sept%203%20FINAL-](https://cmnh.lstmed.ac.uk/sites/default/files/content/centre-news-articles/attachments/CEMD%20Main%20Report%20Sept%203%20FINAL-%20Full%20Report.pdf)  
640 [%20Full%20Report.pdf](https://cmnh.lstmed.ac.uk/sites/default/files/content/centre-news-articles/attachments/CEMD%20Main%20Report%20Sept%203%20FINAL-%20Full%20Report.pdf).
- 641 6. WHO. Strategies towards ending preventable maternal mortality (EPMM) 2015 2nd  
642 March 2021]. Available from: <https://apps.who.int/iris/handle/10665/153544>.
- 643 7. Banke-Thomas A, Maua J, Madaj B, Ameh C, van den Broek N. Perspectives of  
644 stakeholders on emergency obstetric care training in Kenya: A qualitative study.  
645 International Health. 2020;12:11-8.

- 646 8. Ameh A, Mdegela M, White S, van den Broek N. The effectiveness of training in  
647 emergency obstetric care: A systematic literature review. *Health Policy and Planning*.  
648 2019;34:257-70.
- 649 9. Berga K, Vadnais E, Nelson J, Johnston S, Buro K, Hu R, et al. Blended learning  
650 versus face-to-face learning in an undergraduate nursing health assessment course: A  
651 quasi-experimental study. *Nurse Education Today*. 2021;96(104622).
- 652 10. Yigzaw M, Tebekaw Y, Kim Y, Kols A, Ayalew F, Eyassu G. Comparing the  
653 effectiveness of a blended learning approach with a conventional learning approach for  
654 basic emergency obstetric and newborn care training in Ethiopia. *Midwifery*. 2019;78:42-  
655 9.
- 656 11. Shikuku DN, Tallam, E, Wako, I, Mualuko, A, Waweru, L, Nyaga, L, et al. Evaluation  
657 of capacity to deliver Emergency Obstetrics and Newborn Care updated midwifery and  
658 reproductive health training curricula in Kenya: Before and after study. 2022.
- 659 12. Shikuku DN, Tallam E, Wako I, Mualuko A, Waweru L, Nyaga L, et al. Educators'  
660 perceptions of the early impact of COVID-19 on midwifery training in Kenya: a cross-  
661 sectional survey. *International Health*. 2021.
- 662 13. WHO. WHO recommendations on antenatal care for a positive pregnancy  
663 experience. Geneva, Switzerland: World Health Organization; 2016.
- 664 14. Bowen D, Kreuter M, Spring B, Cofta-Woerpel L, Linnan L, Weiner D, et al. How we  
665 design feasibility studies. *American Journal of Preventive Medicine*. 2009.
- 666 15. Fiorini L, Griffiths A, Houdmont J. Mixed methods research in the health sciences:  
667 A review. *Malta Journal of Health Sciences*. 2016.
- 668 16. Kirkpatrick D. Great Ideas Revisited: Revisiting Kirkpatrick's Four-Level Model.  
669 *Training & Development*. 1996;50:54-7.
- 670 17. Teare M, Dimairo M, Shephard N, Hayman A, Whitehead A, Walters S. Sample size  
671 requirements to estimate key design parameters from external pilot randomised controlled  
672 trials: A simulation study. *Trials*. 2014;15:264.

- 673 18. Ladur AN, van Teijlingen E, Hundley V. `Whose Shoes?` Can an educational board  
674 game engage Ugandan men in pregnancy and childbirth? BMC Pregnancy Childbirth.  
675 2018;18(1):81.
- 676 19. Jugder N. The thematic analysis of interview data: An approach used to examine  
677 the influence of the market on curricular provision in Mongolian higher education  
678 institutions. 2016.
- 679 20. Marshall S. A Handbook for Teaching and Learning in Higher Education: Enhancing  
680 Academic Practice: Routledge; 2020.
- 681 21. Liu Q, Peng W, Zhang F, Hu R, Li Y, Yan W. The effectiveness of blended learning  
682 in health professions: Systematic review and meta-analysis. Journal of Medical Internet  
683 Research. 2016;18(1).
- 684 22. Sung Y, Kwon I, Ryu E. Blended learning on medication administration for new  
685 nurses: Integration of e-learning and face-to-face instruction in the classroom. Nurse  
686 Education Today. 2008;28:943-52.
- 687 23 Banke-Thomas, OA, Madaj, B, Ameh, C, van den Broek, N. Social return on investment  
688 methodology to account for value for money of public health interventions: A systematic  
689 review. BMC Public Health. 2015; 15:582.
- 690
- 691
